# Supplementary material for: Percentages of Vaccination Coverage Required to Establish Herd Immunity against SARS-CoV-2
Source: MDPI journal article supplement (doi:10.3390/vaccines10050736), 2022-05-08
Supplement: s1 [file s1]

## **Supplementary material**

Table S1. Completed COVID-19 vaccination coverage in countries of the world (April 2022).  
Data from Our World in Data (<https://ourworldindata.org/covid-vaccinations>)

Table S2. Critical vaccination coverage ( $V_c$ ) required to establish herd immunity against SARS-CoV-2 with reproductive numbers ( $R_0$ ) from 1.1 to 10 by vaccination effectiveness

Table S3. Critical vaccination coverage ( $V_c$ ) required to establish herd immunity against SARS-CoV-2 with different basic reproductive numbers ( $R_0$ ) by COVID-19 vaccination effectiveness, with 10% of individuals protected and 9.8% infections among vaccinated individuals

Table S4. Critical vaccination coverage ( $V_c$ ) required to establish herd immunity against SARS-CoV-2 with different basic reproductive numbers ( $R_0$ ) by vaccine effectiveness, with 20% of individuals protected and 9.8% infections among vaccinated individuals

Table S1. Completed COVID-19 vaccination coverage in countries of the world (April 2022).  
Data from Our World in Data (<https://ourworldindata.org/covid-vaccinations>)

| Country                  | %    |
|--------------------------|------|
| Afghanistan              | 11.4 |
| Albania                  | 42.5 |
| Algeria                  | 13.7 |
| Andorra                  | 69.0 |
| Angola                   | 17.7 |
| Antigua and Barbuda      | 62.5 |
| Argentina                | 81.2 |
| Armenia                  | 33.0 |
| Aruba                    | 76.1 |
| Australia                | 82.8 |
| Austria                  | 73.0 |
| Azerbaijan               | 47.3 |
| Bahamas                  | 39.5 |
| Bahrain                  | 69.6 |
| Bangladesh               | 69.0 |
| Barbados                 | 52.6 |
| Belarus                  | 58.3 |
| Belgium                  | 78.5 |
| Belize                   | 51.8 |
| Benin                    | 19.5 |
| Bhutan                   | 4.7  |
| Bolivia                  | 49.1 |
| Bosnia and Herzegovina   |      |
| Botswana                 | 53.9 |
| Brazil                   | 75.5 |
| Brunei                   | 91.8 |
| Bulgaria                 | 29.8 |
| Burkina Faso             | 5.5  |
| Burundi                  | 0.1  |
| Cambodia                 | 83.1 |
| Cameroon                 | 3.9  |
| Canada                   | 82.0 |
| Cape Verde               | 54.6 |
| Central African Republic | 18.3 |
| Chad                     | 4.5  |
| Chile                    | 90.6 |
| China                    | 86.1 |
| Colombia                 | 68.3 |
| Comoros                  | 33.9 |
| Congo                    | 12.0 |

|                              |      |
|------------------------------|------|
| Cook Islands                 | 83.5 |
| Costa Rica                   | 78.0 |
| Cote d'Ivoire                | 17.0 |
| Croatia                      | 54.9 |
| Cuba                         | 87.6 |
| Curacao                      | 59.8 |
| Cyprus                       |      |
| Czechia                      | 64.0 |
| Democratic Republic of Congo | 0.6  |
| Denmark                      | 82.6 |
| Djibouti                     | 10.9 |
| Dominica                     | 41.6 |
| Dominican Republic           | 54.3 |
| Ecuador                      | 77.2 |
| Egypt                        | 30.9 |
| El Salvador                  | 65.8 |
| Equatorial Guinea            | 14.5 |
| Estonia                      | 63.6 |
| Eswatini                     | 27.2 |
| Ethiopia                     | 17.8 |
| Fiji                         | 69.6 |
| Finland                      | 77.7 |
| France                       | 77.8 |
| Gabon                        | 11.1 |
| Gambia                       | 12.8 |
| Georgia                      | 31.6 |
| Germany                      | 75.3 |
| Ghana                        | 16.0 |
| Greece                       | 73.3 |
| Grenada                      | 33.6 |
| Guatemala                    | 32.9 |
| Guinea                       | 18.4 |
| Guinea-Bissau                | 16.9 |
| Guyana                       | 45.8 |
| Haiti                        | 1.0  |
| Honduras                     | 45.5 |
| Hungary                      | 64.2 |
| Iceland                      | 78.7 |
| India                        | 60.0 |
| Indonesia                    | 58.2 |
| Iran                         | 67.1 |
| Iraq                         | 17.6 |
| Ireland                      | 80.5 |
| Israel                       | 66.0 |
| Italy                        | 79.3 |

|                  |      |
|------------------|------|
| Jamaica          | 22.8 |
| Japan            | 80.0 |
| Kazakhstan       | 48.4 |
| Kenya            | 14.9 |
| Kiribati         | 45.6 |
| Kosovo           | 46.1 |
| Kuwait           | 75.9 |
| Kyrgyzstan       | 18.9 |
| Laos             | 62.5 |
| Latvia           | 69.8 |
| Lebanon          | 32.6 |
| Lesotho          | 33.7 |
| Liberia          | 20.9 |
| Libya            | 16.3 |
| Liechtenstein    | 69.0 |
| Lithuania        | 69.6 |
| Luxembourg       | 72.6 |
| Madagascar       | 3.7  |
| Malawi           | 4.4  |
| Malaysia         | 78.9 |
| Maldives         | 70.6 |
| Mali             | 4.7  |
| Malta            | 90.5 |
| Mauritania       | 22.3 |
| Mauritius        | 76.2 |
| Mexico           | 61.2 |
| Moldova          | 26.3 |
| Monaco           |      |
| Mongolia         | 65.3 |
| Montenegro       | 44.9 |
| Morocco          | 62.6 |
| Mozambique       | 41.1 |
| Myanmar          | 40.2 |
| Namibia          | 14.9 |
| Nauru            | 70.6 |
| Nepal            | 64.9 |
| Netherlands      | 72.2 |
| New Zealand      | 79.4 |
| Nicaragua        | 65.6 |
| Niger            | 6.2  |
| Nigeria          | 4.5  |
| Niue             | 87.8 |
| North Macedonia  | 40.1 |
| Northern Ireland | 70.3 |
| Norway           | 73.7 |
| Oman             | 57.9 |

|                                     |      |
|-------------------------------------|------|
| Pakistan                            | 51.4 |
| Panama                              | 69.3 |
| Papua New Guinea                    | 2.8  |
| Paraguay                            | 46.1 |
| Peru                                | 78.4 |
| Philippines                         | 59.7 |
| Poland                              | 59.2 |
| Portugal                            | 92.6 |
| Qatar                               | 88.5 |
| Romania                             | 42.3 |
| Russia                              | 50.0 |
| Rwanda                              | 61.4 |
| Saint Kitts and Nevis               |      |
| Saint Lucia                         | 28.6 |
| Saint Vincent and the<br>Grenadines | 27.1 |
| Samoa                               | 66.0 |
| San Marino                          | 69.4 |
| Sao Tome and Principe               | 38.9 |
| Saudi Arabia                        | 69.6 |
| Senegal                             | 6.0  |
| Serbia                              | 47.6 |
| Seychelles                          | 81.0 |
| Sierra Leone                        | 13.8 |
| Singapore                           | 91.1 |
| Slovakia                            | 50.7 |
| Slovenia                            | 58.7 |
| Solomon Islands                     | 17.4 |
| Somalia                             | 8.3  |
| South Africa                        | 30.0 |
| South Korea                         | 86.8 |
| South Sudan                         | 4.2  |
| Spain                               | 86.1 |
| Sri Lanka                           | 67.1 |
| Sudan                               | 7.5  |
| Suriname                            | 0.1  |
| Sweden                              | 75.0 |
| Switzerland                         | 68.6 |
| Syria                               | 7.4  |
| Taiwan                              | 76.8 |
| Tajikistan                          | 49.8 |
| Tanzania                            | 5.0  |
| Thailand                            | 72.0 |
| Timor                               | 44.0 |
| Togo                                | 18.4 |
| Tonga                               | 65.8 |

|                      |      |
|----------------------|------|
| Trinidad and Tobago  | 50.6 |
| Tunisia              | 53.2 |
| Turkey               | 62.3 |
| Turkmenistan         |      |
| Tuvalu               |      |
| Uganda               | 17.0 |
| Ukraine              |      |
| United Arab Emirates | 96.3 |
| United Kingdom       | 72.6 |
| United States        | 65.7 |
| Uruguay              | 81.9 |
| Uzbekistan           | 41.8 |
| Vanuatu              | 27.1 |
| Venezuela            | 49.8 |
| Vietnam              | 79.2 |
| Yemen                | 1.3  |
| Zambia               | 11.9 |
| Zimbabwe             | 23.7 |
| Regions of the World |      |
| South America        | 73.2 |
| Asia                 | 67.7 |
| Europe               | 65.3 |
| Oceania              | 62.9 |
| North America        | 62.7 |
| Africa               | 15.4 |
| World                | 58.2 |

Table S2. Critical vaccination coverage ( $V_c$ ) required to establish herd immunity against SARS-CoV-2 with reproductive numbers ( $R_0$ ) from 1.1 to 10 by vaccination effectiveness

| $R_0$ of SARS-CoV-2 <sup>c</sup> | Critical vaccination coverage (%) <sup>a</sup><br>for Covid-19 vaccine effectiveness from 10% to 100% |      |      |      |      |      |      |      |      |      |
|----------------------------------|-------------------------------------------------------------------------------------------------------|------|------|------|------|------|------|------|------|------|
|                                  | 10%                                                                                                   | 20%  | 30%  | 40%  | 50%  | 60%  | 70%  | 80%  | 90%  | 100% |
| 1.1                              | 90.9                                                                                                  | 45.5 | 30.3 | 22.7 | 18.2 | 15.2 | 13.0 | 11.4 | 10.1 | 9.1  |
| 1.25                             | –                                                                                                     | 100  | 66.7 | 50.0 | 40.0 | 33.3 | 28.6 | 25.0 | 22.2 | 20.0 |
| 1.5                              | –                                                                                                     | –    | –    | 83.3 | 66.7 | 55.6 | 47.6 | 41.7 | 37.0 | 33.3 |
| 1.75                             | –                                                                                                     | –    | –    | –    | 85.7 | 71.4 | 61.2 | 53.6 | 47.6 | 42.9 |
| 2                                | –                                                                                                     | –    | –    | –    | 100  | 83.3 | 71.4 | 62.5 | 55.6 | 50.0 |
| 2.25                             | –                                                                                                     | –    | –    | –    | –    | 92.6 | 79.4 | 69.4 | 61.7 | 55.6 |
| 2.5                              | –                                                                                                     | –    | –    | –    | –    | 100  | 85.7 | 75.0 | 66.7 | 60.0 |
| 2.75                             | –                                                                                                     | –    | –    | –    | –    | –    | 90.9 | 79.5 | 70.7 | 63.6 |
| 3                                | –                                                                                                     | –    | –    | –    | –    | –    | 95.2 | 83.3 | 74.1 | 66.7 |
| 3.25                             | –                                                                                                     | –    | –    | –    | –    | –    | 98.9 | 86.5 | 76.9 | 69.2 |
| 3.5                              | –                                                                                                     | –    | –    | –    | –    | –    | –    | 89.3 | 79.4 | 71.4 |
| 3.75                             | –                                                                                                     | –    | –    | –    | –    | –    | –    | 91.7 | 81.5 | 73.3 |
| 4                                | –                                                                                                     | –    | –    | –    | –    | –    | –    | 93.8 | 83.3 | 75.0 |
| 4.25                             | –                                                                                                     | –    | –    | –    | –    | –    | –    | 95.6 | 85.0 | 76.5 |
| 4.5                              | –                                                                                                     | –    | –    | –    | –    | –    | –    | 97.2 | 86.4 | 77.8 |
| 4.75                             | –                                                                                                     | –    | –    | –    | –    | –    | –    | 98.7 | 87.7 | 78.9 |
| 5                                | –                                                                                                     | –    | –    | –    | –    | –    | –    | 100  | 88.9 | 80.0 |
| 6                                | –                                                                                                     | –    | –    | –    | –    | –    | –    | –    | 92.6 | 83.3 |
| 7                                | –                                                                                                     | –    | –    | –    | –    | –    | –    | –    | 95.2 | 85.7 |
| 8                                | –                                                                                                     | –    | –    | –    | –    | –    | –    | –    | 97.2 | 87.5 |
| 9                                | –                                                                                                     | –    | –    | –    | –    | –    | –    | –    | 98.8 | 88.9 |
| 10                               | –                                                                                                     | –    | –    | –    | –    | –    | –    | –    | 100  | 90.0 |

- $V_c = I_c/\text{Effectiveness}$ . The critical vaccination coverage is not indicated (–) when herd immunity could not be established with 100% vaccination coverage
- $I_c = 1 - (1/R_0)$ .
- The basic reproduction number  $R_0$  indicates the average number of secondary cases generated per infected case in a completely susceptible population

Table S3. Critical vaccination coverage ( $V_c$ ) required to establish herd immunity against SARS-CoV-2 with different basic reproductive numbers ( $R_0$ ) by COVID-19 vaccination effectiveness, with 10% of individuals protected and 9.8% infections among vaccinated individuals

| R <sub>0</sub> of<br>SARS-<br>CoV <sup>c</sup> | Critical vaccination coverage (%) <sup>a</sup><br>for Covid-19 vaccine effectiveness from 10% to 100% |      |      |      |      |      |      |      |      |      |
|------------------------------------------------|-------------------------------------------------------------------------------------------------------|------|------|------|------|------|------|------|------|------|
|                                                | 10%                                                                                                   | 20%  | 30%  | 40%  | 50%  | 60%  | 70%  | 80%  | 90%  | 100% |
| 1.1                                            | 0                                                                                                     | 0    | 0    | 0    | 0    | 0    | 0    | 0    | 0    | 0    |
| 1.25                                           | –                                                                                                     | 98.0 | 49.5 | 33.1 | 24.9 | 19.9 | 16.6 | 14.2 | 12.5 | 11.1 |
| 1.5                                            | –                                                                                                     | –    | –    | 77.3 | 58.0 | 46.5 | 38.8 | 33.2 | 29.1 | 25.9 |
| 1.75                                           | –                                                                                                     | –    | –    | –    | 81.7 | 65.5 | 54.6 | 46.8 | 41.0 | 36.4 |
| 2                                              | –                                                                                                     | –    | –    | –    | 99.5 | 79.7 | 66.4 | 57.0 | 49.9 | 44.3 |
| 2.25                                           | –                                                                                                     | –    | –    | –    | –    | 90.7 | 75.7 | 64.9 | 56.8 | 50.5 |
| 2.5                                            | –                                                                                                     | –    | –    | –    | –    | 99.6 | 83.1 | 71.2 | 62.3 | 55.4 |
| 2.75                                           | –                                                                                                     | –    | –    | –    | –    | –    | 89.1 | 76.4 | 66.9 | 59.5 |
| 3                                              | –                                                                                                     | –    | –    | –    | –    | –    | 94.1 | 80.7 | 70.7 | 62.8 |
| 3.25                                           | –                                                                                                     | –    | –    | –    | –    | –    | 98.4 | 84.4 | 73.9 | 65.7 |
| 3.5                                            | –                                                                                                     | –    | –    | –    | –    | –    | –    | 87.5 | 76.6 | 68.1 |
| 3.75                                           | –                                                                                                     | –    | –    | –    | –    | –    | –    | 90.2 | 79.0 | 70.2 |
| 4                                              | –                                                                                                     | –    | –    | –    | –    | –    | –    | 92.6 | 81.0 | 72.1 |
| 4.25                                           | –                                                                                                     | –    | –    | –    | –    | –    | –    | 94.7 | 82.9 | 73.7 |
| 4.5                                            | –                                                                                                     | –    | –    | –    | –    | –    | –    | 96.5 | 84.5 | 75.1 |
| 4.75                                           | –                                                                                                     | –    | –    | –    | –    | –    | –    | 98.2 | 86.0 | 76.4 |
| 5                                              | –                                                                                                     | –    | –    | –    | –    | –    | –    | 99.7 | 87.3 | 77.6 |
| 6                                              | –                                                                                                     | –    | –    | –    | –    | –    | –    | –    | 91.4 | 81.3 |
| 7                                              | –                                                                                                     | –    | –    | –    | –    | –    | –    | –    | 94.4 | 83.9 |
| 8                                              | –                                                                                                     | –    | –    | –    | –    | –    | –    | –    | 96.6 | 85.9 |
| 9                                              | –                                                                                                     | –    | –    | –    | –    | –    | –    | –    | 98.4 | 87.5 |
| 10                                             | –                                                                                                     | –    | –    | –    | –    | –    | –    | –    | 99.8 | 88.7 |

- a.  $V_c = I_c / \text{Effectiveness}$ .  $I_c = 1 - (1/R_0)$ . The critical vaccination coverage is not indicated (–) when herd immunity could not be established with 100% vaccination coverage
- b. The basic reproduction number  $R_0$  indicates the average number of secondary cases generated per infected case in a completely susceptible population

Table S4. Critical vaccination coverage ( $V_c$ ) required to establish herd immunity against SARS-CoV-2 with different basic reproductive numbers ( $R_0$ ) by vaccine effectiveness, with 20% of individuals protected and 9.8% infections among vaccinated individuals

| R <sub>0</sub> of<br>SARS-<br>CoV <sup>c</sup> | Critical vaccination coverage (%) <sup>a</sup><br>for Covid-19 vaccine effectiveness from 10% to 100% |     |      |      |      |      |      |      |      |      |
|------------------------------------------------|-------------------------------------------------------------------------------------------------------|-----|------|------|------|------|------|------|------|------|
|                                                | 10%                                                                                                   | 20% | 30%  | 40%  | 50%  | 60%  | 70%  | 80%  | 90%  | 100% |
| 1.1                                            | 0                                                                                                     | 0   | 0    | 0    | 0    | 0    | 0    | 0    | 0    | 0    |
| 1.25                                           | 0.0                                                                                                   | 0.0 | 0.0  | 0.0  | 0.0  | 0.0  | 0.0  | 0.0  | 0.0  | 0.0  |
| 1.5                                            | –                                                                                                     | –   | 66.0 | 44.2 | 33.2 | 26.6 | 22.1 | 19.0 | 16.6 | 14.8 |
| 1.75                                           | –                                                                                                     | –   | –    | 75.7 | 56.9 | 45.5 | 38.0 | 32.6 | 28.5 | 25.3 |
| 2                                              | –                                                                                                     | –   | –    | 99.3 | 74.6 | 59.8 | 49.8 | 42.7 | 37.4 | 33.3 |
| 2.25                                           | –                                                                                                     | –   | –    | –    | 88.4 | 70.8 | 59.1 | 50.6 | 44.3 | 39.4 |
| 2.5                                            | –                                                                                                     | –   | –    | –    | 99.5 | 79.7 | 66.4 | 57.0 | 49.9 | 44.3 |
| 2.75                                           | –                                                                                                     | –   | –    | –    | –    | 86.9 | 72.5 | 62.2 | 54.4 | 48.4 |
| 3                                              | –                                                                                                     | –   | –    | –    | –    | 93.0 | 77.5 | 66.5 | 58.2 | 51.7 |
| 3.25                                           | –                                                                                                     | –   | –    | –    | –    | 98.1 | 81.8 | 70.1 | 61.4 | 54.6 |
| 3.5                                            | –                                                                                                     | –   | –    | –    | –    | –    | 85.4 | 73.3 | 64.1 | 57.0 |
| 3.75                                           | –                                                                                                     | –   | –    | –    | –    | –    | 88.6 | 76.0 | 66.5 | 59.1 |
| 4                                              | –                                                                                                     | –   | –    | –    | –    | –    | 91.4 | 78.3 | 68.6 | 61.0 |
| 4.25                                           | –                                                                                                     | –   | –    | –    | –    | –    | 93.8 | 80.4 | 70.4 | 62.6 |
| 4.5                                            | –                                                                                                     | –   | –    | –    | –    | –    | 96.0 | 82.3 | 72.0 | 64.1 |
| 4.75                                           | –                                                                                                     | –   | –    | –    | –    | –    | 97.9 | 84.0 | 73.5 | 65.4 |
| 5                                              | –                                                                                                     | –   | –    | –    | –    | –    | 99.7 | 85.5 | 74.8 | 66.5 |
| 6                                              | –                                                                                                     | –   | –    | –    | –    | –    | –    | 90.2 | 79.0 | 70.2 |
| 7                                              | –                                                                                                     | –   | –    | –    | –    | –    | –    | 93.6 | 81.9 | 72.9 |
| 8                                              | –                                                                                                     | –   | –    | –    | –    | –    | –    | 96.2 | 84.2 | 74.8 |
| 9                                              | –                                                                                                     | –   | –    | –    | –    | –    | –    | 98.1 | 85.9 | 76.4 |
| 10                                             | –                                                                                                     | –   | –    | –    | –    | –    | –    | 99.7 | 87.3 | 77.6 |

- a.  $V_c = I_c / \text{Effectiveness}$ .  $I_c = 1 - (1/R_0)$ . The critical vaccination coverage is not indicated (–) when herd immunity could not be established with 100% vaccination coverage
- b. The basic reproduction number  $R_0$  indicates the average number of secondary cases generated per infected case in a completely susceptible population
